# Supplementary material for: Identification of MicroRNAs in Helicoverpa armigera and Spodoptera litura Based on Deep Sequencing and Homology Analysis
Source: PubMed Central journal article supplement — Int J Biol Sci. 2012 Dec 1;9(1):1–15. doi: 10.7150/ijbs.5249 (PMC3535529; doi:10.7150/ijbs.5249), 2012-12-01

**Table S1. Primers used in this research.** All the miRNA sequences and the designed primer sequences for miRNA qRT-PCR, as well as the primer sequences for the amplification of 3' UTRs or precursor miRNAs are listed.

| <b>For miRNA Realtime</b>                |                                            |                             |                             |                             |
|------------------------------------------|--------------------------------------------|-----------------------------|-----------------------------|-----------------------------|
| <b>Name</b>                              | <b>har-miRNA</b>                           | <b>sli-miRNA</b>            | <b>bmo-miRNA</b>            | <b>Primer Sequence</b>      |
| <i>miR-2a</i>                            | UAUCACAGCCAGCUUUGAUGA                      | UCACAGCCAGCUUUGAUGAG<br>C   | UAUCACAGCCAGCUUUGAUG<br>AGC | TATCACAGCCAGCTTTGATG<br>AGC |
| <i>miR-34</i>                            | UGGCAGUGUGGUUAGCUG                         | UGGCAGUGUGGUUAGCUGGU<br>UGU | UGGCAGUGUGGUUAGCUGG<br>UUG  | TGGCAGTGTGGTTAGCTGGT        |
| <i>miR-2796-3p</i>                       | GUAGGCCGCGGAAACUACU                        |                             | GUAGGCCGCGGAAACUACU<br>UGC  | GTAGGCCGCGGAAACTA           |
| <i>miR-11</i>                            |                                            | CAUCACAGUCAGAGUUCUAG<br>CU  | CAUCACAGUCAGAGUUCUAG<br>CU  | CATCACAGTCAGAGTTCTAG<br>CT  |
| <i>U6 isoform E</i>                      |                                            |                             |                             | AGGATGACACGCAAATCG<br>T     |
| <b>For 3'UTR Amplification</b>           |                                            |                             |                             |                             |
| <b>PrimerName</b>                        | <b>Sequence</b>                            | <b>Restriction Site</b>     | <b>Species</b>              | <b>NucleotideID</b>         |
| BmoHSP90-F                               | GCtctagaCTCTACTTTAACTGTAGGAACCATG<br>TC    | XbaI                        | <i>Bombyx mori</i>          | NM_001043411                |
| BmoHSP90-R                               | GGAATTCcatatgGATACATTCAGAGTTCACCT<br>TTAGC | NdeI                        | <i>Bombyx mori</i>          | NM_001043411                |
| SliHSP90-F                               | GCtctagaTCTCAGCTTTTAGCCATGTTGT             | XbaI                        | <i>Spodoptera litura</i>    | HM046609                    |
| SliHSP90-R                               | GGAATTCcatatgACCATTATTTGATATGAATT<br>TGAAC | NdeI                        | <i>Spodoptera litura</i>    | HM046609                    |
| HarHSP90-F                               | GCtctagaTCTCAGCTTAGCCATGTTGT               | XbaI                        | <i>Helicoverpa armigera</i> | FJ986209                    |
| HarHSP90-R                               | GGAATTCcatatgTGTTAATGTTACCATTTATT<br>TTGA  | NdeI                        | <i>Helicoverpa armigera</i> | FJ986209                    |
| <b>For Precursor miRNA amplification</b> |                                            |                             |                             |                             |
| <b>PrimerName</b>                        | <b>Sequence</b>                            | <b>Restriction Site</b>     | <b>Species</b>              |                             |
| mir14-Xho-F                              | CCGctcgagGGCGTTTTGAATTTTCGATAT             | XhoI                        | <i>Bombyx mori</i>          |                             |
| mir14-EcoI-R                             | CGgaattcCGACCGATTGCGACAAAGAT               | EcoRI                       | <i>Bombyx mori</i>          |                             |

|                |                                |       |                    |
|----------------|--------------------------------|-------|--------------------|
| mir2766-XhoI-F | CCGctcgagACGTTGCGACGAGCGCAGTT  | XhoI  | <i>Bombyx mori</i> |
| mir2766-EcoI-R | CGgaattcACACGAAGCGCCGAAACCCA   | EcoRI | <i>Bombyx mori</i> |
| mir9a-XhoI-F   | CCGctcgagCATCGCGTGCGCTACTTCCCA | XhoI  | <i>Bombyx mori</i> |
| mir9a-EcoI-R   | CGgaattcTACTAGCGACCCGCCCTCGC   | EcoRI | <i>Bombyx mori</i> |

**Table S2. Distribution of small RNAs among different categories.**

| Categories              | <i>H. armigera</i> |            |         |           | <i>S. litura</i> |            |         |           |
|-------------------------|--------------------|------------|---------|-----------|------------------|------------|---------|-----------|
|                         | Unique             | Unique (%) | Total   | Total (%) | Unique           | Unique (%) | Total   | Total (%) |
| <b>exon_antisense</b>   | 183                | 0.02       | 529     | 0.01      | 209              | 0.02       | 588     | 0.01      |
| <b>exon_sense</b>       | 739                | 0.07       | 1025    | 0.02      | 518              | 0.06       | 734     | 0.01      |
| <b>intron_antisense</b> | 411                | 0.04       | 22892   | 0.43      | 299              | 0.03       | 36817   | 0.32      |
| <b>intron_sense</b>     | 861                | 0.08       | 3474    | 0.07      | 556              | 0.06       | 4869    | 0.04      |
| <b>miRNA</b>            | 923                | 0.08       | 1005884 | 19.10     | 818              | 0.09       | 2777193 | 24.27     |
| <b>rRNA</b>             | 45705              | 4.06       | 652803  | 12.40     | 50508            | 5.60       | 1183609 | 10.34     |
| <b>repeat</b>           | 532                | 0.05       | 2288    | 0.04      | 214              | 0.02       | 816     | 0.01      |
| <b>snRNA</b>            | 746                | 0.07       | 2037    | 0.04      | 1074             | 0.12       | 20728   | 0.18      |
| <b>snoRNA</b>           | 127                | 0.01       | 253     | 0.00      | 125              | 0.01       | 214     | 0.00      |
| <b>tRNA</b>             | 8633               | 0.77       | 94809   | 1.80      | 12447            | 1.38       | 189423  | 1.66      |
| <b>unann</b>            | 1066907            | 94.77      | 3480546 | 66.09     | 834601           | 92.59      | 7228502 | 63.17     |

**Table S3. Sequences of predicted miRNAs.** Predicted miRNAs of both *H. armigera* (*har-*) and *S. litura* (*sli-*) are presented with their sequences. Only the sequence with the highest number of reads was selected for each miRNA. The column “Reads” shows the total number of reads for each miRNA.

| miRNA                  | Reads  | Sequences                  |
|------------------------|--------|----------------------------|
| <i>har-bantam</i>      | 12766  | UGAGAUCAUUGUGAAAGCU        |
| <i>har-let-7</i>       | 90492  | UGAGGUAGUAGGUUGUAUAG       |
| <i>har-miR-1</i>       | 2      | UGGGAAGUAAGGAAGCACG        |
| <i>har-miR-10</i>      | 5824   | UACCCUGUAGAUCCGAAUUUGU     |
| <i>har-miR-10*</i>     | 8710   | AAAUUCGGUUCUAGAGAGGUUU     |
| <i>har-miR-100</i>     | 3232   | AACCCGUAGAUCCGAACUUGUG     |
| <i>har-miR-1000</i>    | 2      | AUAUUGUCCUGUCACAGCA        |
| <i>har-miR-11</i>      | 687    | CAUCACAGUCAGAGUUCUAGCU     |
| <i>har-miR-1175-3p</i> | 27     | GAGAUUCAACUCCUCCAACUUA     |
| <i>har-miR-1175-5p</i> | 34     | AAGUGGAGGUGUGAUCUCUUC      |
| <i>har-miR-12</i>      | 325    | UGAGUAUUACUUCAGGUACU       |
| <i>har-miR-124</i>     | 66     | UAAGGCACGCGGUGAAUG         |
| <i>har-miR-133</i>     | 39     | UUGGUCCCCUUCACCAGCU        |
| <i>har-miR-137</i>     | 2      | UAUUGCUUGAGAAUACAC         |
| <i>har-miR-13a</i>     | 5      | UAUCACAGCCACUUUGAUGUG      |
| <i>har-miR-13b</i>     | 8      | UAUCACAGCCAUUUUUGACGAG     |
| <i>har-miR-14</i>      | 1080   | UCAGUCUUUUUCUCUCCUAU       |
| <i>har-miR-184</i>     | 40631  | UGGACGGAGAACUGAUAAGGGC     |
| <i>har-miR-190</i>     | 544    | AGAU AUGUUUGAU AUUCUUGGUUG |
| <i>har-miR-1a</i>      | 629624 | UGGAAUGUAAAGAAGUAUGG       |
| <i>har-miR-1a*</i>     | 14     | CCGUGCUUCCUACUCCCAUA       |
| <i>har-miR-210</i>     | 6      | UUGUGCGUGUGACAGCGGCU       |
| <i>har-miR-252</i>     | 378    | CUAAGUACUAGUGCCGCAG        |
| <i>har-miR-263a</i>    | 26616  | AAUGGCACUGGAAGAAUUCACGG    |
| <i>har-miR-263b</i>    | 71     | CUUGGCACUGGGAGAAUUC        |
| <i>har-miR-274</i>     | 2      | UUUGUGACCGUCACUAACG        |
| <i>har-miR-2745</i>    | 1      | UAAAUUCGGUCUUUCGGGCAU      |
| <i>har-miR-275</i>     | 14593  | UCAGGUACCUGAAGUAGCGC       |
| <i>har-miR-2755</i>    | 40122  | CACCCUGUCAGACCAUACUUGUU    |
| <i>har-miR-276</i>     | 1784   | AGCGAGGUAUAGAGUCCUACG      |
| <i>har-miR-276*</i>    | 8015   | UAGGAACUUCAUACCGUGC        |
| <i>har-miR-2765</i>    | 20     | UGGUAACUCCACCACCGUUGGC     |
| <i>har-miR-2766</i>    | 15524  | UCAGUCUUGUCGAAUGGU         |
| <i>har-miR-2766*</i>   | 1      | CCGCCCUCGUCUUGACU          |
| <i>har-miR-2767</i>    | 76     | CAAGUAAAUCUCGUGCGG         |
| <i>har-miR-2768</i>    | 9      | AUUGGUUAAGAU AUUGCAUC      |
| <i>har-miR-277</i>     | 1812   | UAAAUGCACUAUCUGGUACGACA    |
| <i>har-miR-277*</i>    | 54     | UCGUGCCAGGAGUGCGUUUGCA     |
| <i>har-miR-2779</i>    | 85     | AUCCGGCUCGAAGGACCA         |
| <i>har-miR-278</i>     | 2692   | UCGGUGGGAUCUUCGUCCGUUU     |
| <i>har-miR-278*</i>    | 491    | CCGGACGAACUCCAGCUCGGCC     |

|                        |       |                         |
|------------------------|-------|-------------------------|
| <i>har-miR-2796-3p</i> | 2478  | GUAGGCCGGCGGAAACUACU    |
| <i>har-miR-2796-5p</i> | 5     | AGGGGUUUCUUUCGGCCUUCA   |
| <i>har-miR-279a</i>    | 1259  | UGACUAGAUCACACUCAUCCA   |
| <i>har-miR-279b</i>    | 6816  | UGACUAGAUCUACACUCAUUG   |
| <i>har-miR-279c</i>    | 7347  | UGACUAGAUCCAUACUCGUCU   |
| <i>har-miR-281</i>     | 15    | UGUCAUGGAGUUGCUCUCUUUA  |
| <i>har-miR-281*</i>    | 27726 | AAGAGAGCUAUCCGUCGACAGU  |
| <i>har-miR-282</i>     | 175   | UAGCCUCUCCUUGGCUUUGUCU  |
| <i>har-miR-282*</i>    | 1     | ACAUAGCCUGAUAGAGGUU     |
| <i>har-miR-283</i>     | 3981  | AAUAUACAGCUGGUAUU       |
| <i>har-miR-285</i>     | 5005  | UAGCACCAUUCGAAUUCAGU    |
| <i>har-miR-2a</i>      | 422   | UAUCACAGCCAGCUUUGAUGA   |
| <i>har-miR-2b</i>      | 57    | UAUCACAGCCAGCUUUGUUGA   |
| <i>har-miR-305</i>     | 486   | AUUGUACUUCAUCAGGUG      |
| <i>har-miR-305*</i>    | 1107  | AGGCGCUUGUUGGAGUACACU   |
| <i>har-miR-306a</i>    | 317   | UCAGGUACUAGGUGACUCUGAG  |
| <i>har-miR-307</i>     | 679   | UCACAACCUCCUUGAGUGAGCGA |
| <i>har-miR-307*</i>    | 6     | ACUCACUCAACCUGGUGUGAUG  |
| <i>har-miR-308</i>     | 140   | AAUCACAGGAUAAUACUGCGAG  |
| <i>har-miR-31</i>      | 1257  | AGGCAAGAAGUCGGCAUA      |
| <i>har-miR-316*</i>    | 23    | UGUCUUUUUCCGCUUUGCUGC   |
| <i>har-miR-317</i>     | 1617  | UGAACACAGCUGGUGGUAUCUCA |
| <i>har-miR-317*</i>    | 2     | GGGUGCCACGCUGUGCUCUCU   |
| <i>har-miR-33</i>      | 193   | GUGCAUUGUAGUUGCAUU      |
| <i>har-miR-3338</i>    | 16    | AUGUACUUACUUUGUUUGUUCU  |
| <i>har-miR-34</i>      | 2473  | UGGCAGUGUGGUUAGCUG      |
| <i>har-miR-34*</i>     | 3     | AGCCACUAACGACACUGC      |
| <i>har-miR-375*</i>    | 6     | UUUGUUCGCCCCGGCUCG      |
| <i>har-miR-7</i>       | 351   | UGGAAGACUAGUGAUUUU      |
| <i>har-miR-71*</i>     | 46    | UCUCACUACCUUGUCUUUCAU   |
| <i>har-miR-745</i>     | 16    | CAGCUGCCUAGCGAAGGGCAA   |
| <i>har-miR-750</i>     | 5843  | CCAGAUCUAUCUUUCCAGCU    |
| <i>har-miR-750*</i>    | 1     | AGUUGGACAGGGGAUCUUGA    |
| <i>har-miR-79</i>      | 46    | AUAAAGCUAGAUUACCAAAG    |
| <i>har-miR-8</i>       | 5434  | UAAUACUGUCAGGUAAGAUGU   |
| <i>har-miR-8*</i>      | 12789 | CAUCUUACCGGGCAGCAUUAG   |
| <i>har-miR-87</i>      | 28    | GUGAGCAAACUUUCAGGUGU    |
| <i>har-miR-927</i>     | 51    | UUUAGAAUCCUACGCUUUACC   |
| <i>har-miR-927*</i>    | 71    | CAAAGCGUUUGGAUUCUAA     |
| <i>har-miR-92a</i>     | 232   | UAUUGCACCAGUCCCGGCCUAU  |
| <i>har-miR-92b</i>     | 191   | AAUUGCACCAAUCCCGGCCU    |
| <i>har-miR-932</i>     | 20    | UCAAUUCCGUAGUGCAUU      |
| <i>har-miR-965*</i>    | 28    | UAAGCGUAUAGCUUUUCCC     |
| <i>har-miR-970</i>     | 805   | UCAUAAGACACACGCGGCU     |
| <i>har-miR-989</i>     | 3785  | GUGUGAUGUGACGUAGUGG     |
| <i>har-miR-993a</i>    | 172   | GAAGCUCGUCUCUACAGGUAUC  |
| <i>har-miR-993a*</i>   | 675   | UACCCUGUAGAUCCGGGCUUUU  |

|                         |        |                          |
|-------------------------|--------|--------------------------|
| <i>har-miR-993b*</i>    | 59     | UACCCUGUAGAUCGGGCUUU     |
| <i>har-miR-998</i>      | 811    | UAGCACCAUGGGAUUCAGCU     |
| <i>har-miR-9a</i>       | 981    | UCUUUGGUUAUCUAGCUGUAUG   |
| <i>har-miR-9a*</i>      | 150    | UAAAGCUAGGUUACCGGAGUUA   |
| <i>har-miR-9c</i>       | 120    | UAAAGUUAUGGUACCGAAGUUA   |
| <i>har-miR-9c*</i>      | 127    | UCUUUGGUAUCCUAGCUG       |
| <i>har-miR-iab-4-3p</i> | 42     | CGGUUAUACCUUCAGUAUACGUA  |
| <i>har-miR-iab-4-5p</i> | 2896   | ACGUUAUCUGAAUGUAUCC      |
| <i>har-miR-iab-8</i>    | 36     | UUACGUUAUCUGAAGGUUAU     |
| <i>sli-bantam</i>       | 290    | UGAGAUCAUUGUGAAAGCU      |
| <i>sli-bantam*</i>      | 21     | UGGUUUUCAUAAUGAUUUGACAGA |
| <i>sli-let-7</i>        | 105685 | UGAGGUAGUAGGUUGUAUAG     |
| <i>sli-miR-1</i>        | 15     | UGGGAAGUAAGGAAGCACGGAA   |
| <i>sli-miR-10</i>       | 16271  | UACCCUGUAGAUCCGAAUUUGU   |
| <i>sli-miR-10*</i>      | 11501  | CAAAUUCGGUUCUAGAGAGG     |
| <i>sli-miR-100</i>      | 8879   | AACCCGUAGAUCCGAACUUGU    |
| <i>sli-miR-1000</i>     | 1      | AUAUUGUCCUGUCACAGCAGUA   |
| <i>sli-miR-11</i>       | 1960   | CAUCACAGUCAGAGUUCUAGCU   |
| <i>sli-miR-1175-3p</i>  | 261    | UGAGAUUCAACUCCUCCAACUU   |
| <i>sli-miR-1175-5p</i>  | 28     | AAGUGGAGGUGUGAUCUCUUCA   |
| <i>sli-miR-12</i>       | 995    | UGAGUAUUACUUCAGGUACUGG   |
| <i>sli-miR-124</i>      | 6      | UAAGGCACGCGGUGAAUGC      |
| <i>sli-miR-133</i>      | 8      | UUGGUCCCCUUAACCAGCUGU    |
| <i>sli-miR-137</i>      | 29     | UAUUGCUUGAGAAUACACGUAG   |
| <i>sli-miR-13a</i>      | 5      | UAUCACAGCCACUUUGAUGUG    |
| <i>sli-miR-13b</i>      | 10     | UAUCACAGCCAUUUUUGACGAGUU |
| <i>sli-miR-14</i>       | 1153   | UCAGUCUUUUUCUCUCCUAU     |
| <i>sli-miR-184</i>      | 564278 | UGGACGGAGAACUGAUAAAGGGC  |
| <i>sli-miR-190</i>      | 67     | AGAUUAUGUUUGAUAUUCUUGG   |
| <i>sli-miR-1a</i>       | 1E+06  | UGGAAUGUAAAGAAGUAUGGAG   |
| <i>sli-miR-1a*</i>      | 3      | CCGUGCUUCCUACUUCCCAUA    |
| <i>sli-miR-210</i>      | 10     | CUUGUGCGUGUGACAGCGGCU    |
| <i>sli-miR-252</i>      | 4789   | CUAAGUACUAGUGCCGCAGGAG   |
| <i>sli-miR-263a</i>     | 482707 | AAUGGCACUGGAAGAAUUCACGGG |
| <i>sli-miR-263b</i>     | 9902   | CUUGGCACUGGGAGAAUUCAC    |
| <i>sli-miR-274</i>      | 822    | UUUGUGACCGUCACUACGGGC    |
| <i>sli-miR-275</i>      | 25566  | UCAGGUACCUGAAGUAGCGCGCG  |
| <i>sli-miR-2755</i>     | 511    | CACCCUGUCAGACCAUACUUGUU  |
| <i>sli-miR-276</i>      | 10     | AGCGAGGUUAUAGAGUCCUACG   |
| <i>sli-miR-276*</i>     | 22975  | UAGGAACUUCAUACCGUGCUCU   |
| <i>sli-miR-2765</i>     | 190    | UGGUAACUCCACCACCGUUGGC   |
| <i>sli-miR-2766</i>     | 63546  | UCAGUCUUGUCGAAUGGUGGGU   |
| <i>sli-miR-2767</i>     | 4      | CAAGUAAAUCUCGUGCGG       |
| <i>sli-miR-2768</i>     | 11     | AUUGGUUAAGAUAUUGCAUCGU   |
| <i>sli-miR-277</i>      | 1028   | UAAAUGCACUAUCUGGUACGACA  |
| <i>sli-miR-277*</i>     | 7      | GUGCCAGGAGUGCGUUUGC      |
| <i>sli-miR-278</i>      | 1391   | UCGGUGGGAUCUUCGUCCGUUU   |

|                        |       |                           |
|------------------------|-------|---------------------------|
| <i>sli-miR-278*</i>    | 613   | CCGGACGAACUUCCCAGCUCGGCC  |
| <i>sli-miR-2796-3p</i> | 65    | GUAGGCCGGCGGAAACUACUUGC   |
| <i>sli-miR-279a</i>    | 1297  | UGACUAGAUCACACUCAUCCA     |
| <i>sli-miR-279b</i>    | 12546 | UGACUAGAUCUACACUCAUUGA    |
| <i>sli-miR-279c</i>    | 1172  | UGACUAGAUCCAUACUCGUCUG    |
| <i>sli-miR-281</i>     | 218   | CUGUCAUGGAGUUGCUCUCUUA    |
| <i>sli-miR-281*</i>    | 30851 | AAGAGAGCUAUCCGUCGACAGUA   |
| <i>sli-miR-282</i>     | 276   | UAGCCUCUCCUUGGCUUUGUCUG   |
| <i>sli-miR-282*</i>    | 14    | ACAUAGCCUGAUAGAGGGUACG    |
| <i>sli-miR-283</i>     | 2191  | AAAU AUCAGCUGGUA AUUCUGGG |
| <i>sli-miR-285</i>     | 44    | UAGCACCAUUCGAAUUCAGUGC    |
| <i>sli-miR-2a</i>      | 229   | UCACAGCCAGCUUUGAUGAGC     |
| <i>sli-miR-2b</i>      | 40    | UAUCACAGCCAGCUUUGUUGA     |
| <i>sli-miR-305</i>     | 519   | AUUGUACUUCAUCAGGUGCUCUGG  |
| <i>sli-miR-305*</i>    | 32    | AGGCGCUUGUUGGAGUACACUUA   |
| <i>sli-miR-306a</i>    | 993   | UCAGGUACUAGGUGACUCUGA     |
| <i>sli-miR-307</i>     | 111   | UCACAACCUCCUUGAGUGAGC     |
| <i>sli-miR-307*</i>    | 1     | UCACUCAACCUUGGGUGUGAU     |
| <i>sli-miR-308</i>     | 41    | AAUCACAGGAUAAUACUGCGA     |
| <i>sli-miR-31</i>      | 10440 | AGGCAAGAAGUCGGCAUAGCUGU   |
| <i>sli-miR-317</i>     | 4820  | UGAACACAGCUGGUGGUAUCU     |
| <i>sli-miR-33</i>      | 2     | GUGCAUUGUAGUUGCAUUGC      |
| <i>sli-miR-3338</i>    | 10    | AUGUACUUAUUUGUUGUUCU      |
| <i>sli-miR-34</i>      | 63    | UGGCAGUGUGGUUAGCUGGUUGU   |
| <i>sli-miR-7</i>       | 2332  | UGGAAGACUAGUGAUUUUGU      |
| <i>sli-miR-71*</i>     | 193   | UCUCACUACCUUGUCUUUCAUG    |
| <i>sli-miR-745</i>     | 31    | CAGCUGCCUAGCGAAGGGCAAC    |
| <i>sli-miR-750</i>     | 547   | CCAGAUCUAUCUUCCAGCUCU     |
| <i>sli-miR-750*</i>    | 148   | AGUUGGACAGGGGAUCUUGACA    |
| <i>sli-miR-79</i>      | 97    | AUAAAGCUAGAUUACCAAAGCA    |
| <i>sli-miR-79*</i>     | 1     | CUUUGGCGAUUUAGCUCCGUGA    |
| <i>sli-miR-8</i>       | 84861 | UAAUACUGUCAGGUAAAGAUGUC   |
| <i>sli-miR-8*</i>      | 29365 | CAUCUUACCGGGCAGCAUUAGA    |
| <i>sli-miR-87</i>      | 419   | GUGAGCAAACUUUCAGGUGUGU    |
| <i>sli-miR-927</i>     | 98    | UUUAGAAUCCUACGCUUUACC     |
| <i>sli-miR-927*</i>    | 196   | CAAAGCGUUUGGAUUCUAAAAC    |
| <i>sli-miR-929</i>     | 1     | AAAUUGACUCUAGUAGGGAGUC    |
| <i>sli-miR-92a</i>     | 30    | UAUUGCACCAGUCCCGGCCUAU    |
| <i>sli-miR-92b</i>     | 249   | AAUUGCACCAAUCCCGGCCUGC    |
| <i>sli-miR-932</i>     | 9     | UCAAUUCCGUAGUGCAUUGCAG    |
| <i>sli-miR-965*</i>    | 4     | UAAGCGUAUAGCUUUUCCCCU     |
| <i>sli-miR-970</i>     | 806   | UCAUAAGACACACGCGGCUCU     |
| <i>sli-miR-989</i>     | 48340 | GUGUGAUGUGACGUAGUGGAAG    |
| <i>sli-miR-993a</i>    | 4     | GAAGCUCGUCUCUACAGGUAUC    |
| <i>sli-miR-993a*</i>   | 233   | UACCCUGUAGAUCGGGCUUUUG    |
| <i>sli-miR-993b*</i>   | 2     | UACCCUGUAGAUCGGGCUUU      |
| <i>sli-miR-998</i>     | 392   | UAGCACCAUGGGAUUCAGCUCU    |

|                         |        |                            |
|-------------------------|--------|----------------------------|
| <i>sli-miR-9a</i>       | 9634   | UCUUUGGUUAUCUAGCUGUAUGA    |
| <i>sli-miR-9a*</i>      | 2      | AUAAAGCUAGGUUACCGGAG       |
| <i>sli-miR-9c</i>       | 10     | UAAAGUUAUGGUACCGAAGUUA     |
| <i>sli-miR-9c*</i>      | 177390 | UCUUUGGUAUCCUAGCUGUAGG     |
| <i>sli-miR-iab-4-5p</i> | 38     | ACGUAUACUGAAUGUAUCCUGA     |
| <i>sli-miR-iab-8</i>    | 12     | UUACGUAUACUGAAGGUUAUACCGGA |



**Table S4. Homology analysis of *H. armigera* miRNA homologs.** Metazoan species were divided into four catalogs: insects, other arthropods (arthropods other than insects), other invertebrates (invertebrates other than arthropods), and vertebrates. According to the BLAST results, the miRNAs were classified into four kinds: highly conserved (with homologs in vertebrates), invertebrate-specific (with homologs only in invertebrates), arthropod-specific (with homologs only in arthropods), and insect-specific (with homologs only in insects). “√” indicates the existence of miRNA homologs in the corresponding category. The column “Note” lists our definition of the miRNA (highly conserved, invertebrate-specific, arthropod-specific, or insect-specific). The column "LepiSpecific" indicates whether the miRNA is only identified in lepidopteran species. The last 6 columns indicates whether the miRNA has homologs in the corresponding species. The abbreviations represent species as follows: bmo, *Bombyx mori*; sli, *Spodoptera litura*; mse, *Manduca sexta*; dpl, *Danaus plexippus*; hmeM, *Heliconius melpomene melpomene*; hmeR, *Heliconius melpomene rosina*.

| har-miR         | Lepidopteran | Insects | OtherArthropods | OtherInvertbrates | Vertebrates | Note                  | LepiSpecific | bmo | sli | mse | dpl | hmeM | hmeR |
|-----------------|--------------|---------|-----------------|-------------------|-------------|-----------------------|--------------|-----|-----|-----|-----|------|------|
| har-let-7       | √            | √       | √               | √                 | √           | highly_conserved      | non-specific | √   | √   | √   | √   | √    | √    |
| har-miR-10      | √            | √       | √               | √                 | √           | highly_conserved      | non-specific | √   | √   | —   | √   | √    | √    |
| har-miR-100     | √            | √       | √               | √                 | √           | highly_conserved      | non-specific | √   | √   | √   | —   | √    | √    |
| har-miR-124     | √            | √       | √               | √                 | √           | highly_conserved      | non-specific | √   | √   | √   | √   | —    | —    |
| har-miR-133     | √            | √       | √               | √                 | √           | highly_conserved      | non-specific | √   | √   | √   | √   | —    | —    |
| har-miR-137     | √            | √       | √               | √                 | √           | highly_conserved      | non-specific | √   | √   | √   | √   | √    | —    |
| har-miR-184     | √            | √       | √               | √                 | √           | highly_conserved      | non-specific | √   | √   | √   | √   | √    | √    |
| har-miR-190     | √            | √       | —               | √                 | √           | highly_conserved      | non-specific | √   | √   | √   | √   | √    | —    |
| har-miR-1a      | √            | √       | √               | √                 | √           | highly_conserved      | non-specific | √   | √   | √   | √   | √    | √    |
| har-miR-210     | √            | √       | —               | √                 | √           | highly_conserved      | non-specific | √   | √   | √   | √   | √    | √    |
| har-miR-281     | √            | √       | √               | √                 | √           | highly_conserved      | non-specific | √   | √   | √   | √   | —    | —    |
| har-miR-33      | √            | √       | √               | √                 | √           | highly_conserved      | non-specific | √   | √   | √   | —   | —    | —    |
| har-miR-7       | √            | √       | √               | √                 | √           | highly_conserved      | non-specific | √   | √   | √   | √   | √    | √    |
| har-miR-993a*   | √            | √       | —               | √                 | √           | highly_conserved      | non-specific | √   | √   | √   | —   | √    | √    |
| har-miR-993b*   | √            | √       | —               | √                 | √           | highly_conserved      | non-specific | √   | √   | √   | —   | √    | √    |
| har-miR-9a      | √            | √       | √               | √                 | √           | highly_conserved      | non-specific | √   | √   | √   | √   | √    | √    |
| har-bantam      | √            | √       | √               | √                 | —           | invertebrate_specific | non-specific | √   | √   | √   | √   | √    | √    |
| har-miR-1175-3p | √            | √       | —               | √                 | —           | invertebrate_specific | non-specific | √   | √   | √   | √   | —    | —    |
| har-miR-252     | √            | √       | —               | √                 | —           | invertebrate_specific | non-specific | √   | √   | √   | √   | —    | —    |
| har-miR-263a    | √            | √       | √               | √                 | —           | invertebrate_specific | non-specific | √   | √   | √   | √   | √    | √    |
| har-miR-279a    | √            | √       | √               | √                 | —           | invertebrate_specific | non-specific | √   | √   | √   | √   | √    | √    |

|                  |   |   |   |   |   |                       |              |   |   |   |   |   |   |
|------------------|---|---|---|---|---|-----------------------|--------------|---|---|---|---|---|---|
| har-miR-279c     | √ | √ | — | √ | — | invertebrate_specific | non-specific | √ | √ | √ | √ | √ | √ |
| har-miR-283      | √ | √ | — | √ | — | invertebrate_specific | non-specific | √ | √ | √ | √ | — | — |
| har-miR-2a       | √ | √ | √ | √ | — | invertebrate_specific | non-specific | √ | √ | √ | √ | √ | √ |
| har-miR-2b       | √ | √ | √ | √ | — | invertebrate_specific | non-specific | √ | √ | √ | √ | √ | √ |
| har-miR-307      | √ | √ | √ | √ | — | invertebrate_specific | non-specific | √ | √ | √ | √ | √ | — |
| har-miR-317      | √ | √ | √ | √ | — | invertebrate_specific | non-specific | √ | √ | √ | √ | √ | √ |
| har-miR-34       | √ | √ | √ | √ | — | invertebrate_specific | non-specific | √ | √ | √ | √ | √ | √ |
| har-miR-8        | √ | √ | √ | √ | — | invertebrate_specific | non-specific | √ | √ | √ | √ | √ | √ |
| har-miR-993a     | √ | √ | √ | √ | — | invertebrate_specific | non-specific | √ | √ | — | — | — | — |
| har-miR-275      | √ | √ | √ | — | — | arthropod_specific    | non-specific | √ | √ | √ | √ | √ | √ |
| har-miR-276*     | √ | √ | √ | — | — | arthropod_specific    | non-specific | √ | √ | √ | √ | √ | √ |
| har-miR-278      | √ | √ | √ | — | — | arthropod_specific    | non-specific | √ | √ | √ | √ | √ | — |
| har-miR-305      | √ | √ | √ | — | — | arthropod_specific    | non-specific | √ | √ | √ | √ | √ | √ |
| har-miR-iab-4-3p | √ | √ | √ | — | — | arthropod_specific    | non-specific | √ | — | — | — | — | — |
| har-miR-iab-4-5p | √ | √ | √ | — | — | arthropod_specific    | non-specific | √ | √ | √ | — | — | — |
| har-miR-10*      | √ | √ | — | — | — | insect_specific       | non-specific | √ | √ | √ | — | √ | √ |
| har-miR-1000     | √ | √ | — | — | — | insect_specific       | non-specific | √ | √ | √ | √ | — | — |
| har-miR-11       | √ | √ | — | — | — | insect_specific       | non-specific | √ | √ | √ | √ | √ | √ |
| har-miR-13a      | √ | √ | — | — | — | insect_specific       | non-specific | √ | √ | √ | √ | √ | √ |
| har-miR-13b      | √ | √ | — | — | — | insect_specific       | non-specific | √ | √ | √ | √ | √ | √ |
| har-miR-14       | √ | √ | — | — | — | insect_specific       | non-specific | √ | √ | √ | √ | √ | √ |
| har-miR-1a*      | √ | √ | — | — | — | insect_specific       | non-specific | √ | √ | — | — | — | — |
| har-miR-263b     | √ | √ | — | — | — | insect_specific       | non-specific | √ | √ | √ | √ | √ | √ |
| har-miR-276      | √ | √ | — | — | — | insect_specific       | non-specific | √ | √ | — | — | √ | √ |
| har-miR-2765     | √ | √ | — | — | — | insect_specific       | non-specific | √ | √ | √ | √ | √ | √ |
| har-miR-277      | √ | √ | — | — | — | insect_specific       | non-specific | √ | √ | √ | — | √ | √ |
| har-miR-2796-3p  | √ | √ | — | — | — | insect_specific       | non-specific | √ | √ | √ | √ | — | — |
| har-miR-2796-5p  | √ | √ | — | — | — | insect_specific       | non-specific | √ | — | — | — | — | — |
| har-miR-279b     | √ | √ | — | — | — | insect_specific       | non-specific | √ | √ | √ | √ | √ | √ |
| har-miR-281*     | √ | √ | — | — | — | insect_specific       | non-specific | √ | √ | — | — | √ | √ |
| har-miR-282      | √ | √ | — | — | — | insect_specific       | non-specific | √ | √ | √ | √ | — | — |

|                 |   |   |   |   |   |                 |              |   |   |   |   |   |   |
|-----------------|---|---|---|---|---|-----------------|--------------|---|---|---|---|---|---|
| har-miR-285     | √ | √ | — | — | — | insect_specific | non-specific | √ | √ | √ | √ | — | — |
| har-miR-307*    | √ | √ | — | — | — | insect_specific | non-specific | √ | √ | — | — | √ | — |
| har-miR-316*    | √ | √ | — | — | — | insect_specific | non-specific | √ | — | √ | √ | — | — |
| har-miR-71*     | √ | √ | — | — | — | insect_specific | non-specific | √ | √ | — | — | √ | √ |
| har-miR-79      | √ | √ | — | — | — | insect_specific | non-specific | √ | √ | √ | √ | √ | √ |
| har-miR-8*      | √ | √ | — | — | — | insect_specific | non-specific | √ | √ | — | — | √ | √ |
| har-miR-927     | √ | √ | — | — | — | insect_specific | non-specific | √ | √ | √ | — | — | — |
| har-miR-927*    | √ | √ | — | — | — | insect_specific | non-specific | √ | √ | — | — | — | √ |
| har-miR-92a     | √ | √ | — | — | — | insect_specific | non-specific | √ | √ | √ | √ | √ | √ |
| har-miR-932     | √ | √ | — | — | — | insect_specific | non-specific | √ | √ | √ | √ | — | — |
| har-miR-965*    | √ | √ | — | — | — | insect_specific | non-specific | √ | √ | √ | √ | √ | — |
| har-miR-970     | √ | √ | — | — | — | insect_specific | non-specific | √ | √ | √ | √ | √ | √ |
| har-miR-989     | √ | √ | — | — | — | insect_specific | non-specific | √ | √ | √ | √ | √ | √ |
| har-miR-998     | √ | √ | — | — | — | insect_specific | non-specific | √ | √ | √ | √ | √ | √ |
| har-miR-9a*     | √ | √ | — | — | — | insect_specific | non-specific | √ | √ | √ | √ | √ | √ |
| har-miR-iab-8   | √ | √ | — | — | — | insect_specific | non-specific | √ | √ | √ | — | — | — |
| har-miR-1       | √ | √ | — | — | — | insect_specific | specific     | √ | — | — | — | — | — |
| har-miR-1175-5p | √ | √ | — | — | — | insect_specific | specific     | √ | √ | √ | — | — | — |
| har-miR-12      | √ | √ | — | — | — | insect_specific | specific     | √ | √ | √ | — | √ | √ |
| har-miR-274     | √ | √ | — | — | — | insect_specific | specific     | √ | √ | √ | √ | — | — |
| har-miR-2745    | √ | √ | — | — | — | insect_specific | specific     | √ | — | — | — | — | — |
| har-miR-2755    | √ | √ | — | — | — | insect_specific | specific     | √ | √ | √ | √ | √ | √ |
| har-miR-2766    | √ | √ | — | — | — | insect_specific | specific     | √ | √ | √ | √ | √ | √ |
| har-miR-2766*   | √ | √ | — | — | — | insect_specific | specific     | √ | — | — | — | — | — |
| har-miR-2767    | √ | √ | — | — | — | insect_specific | specific     | √ | √ | √ | √ | √ | √ |
| har-miR-2768    | √ | √ | — | — | — | insect_specific | specific     | √ | √ | √ | √ | √ | √ |
| har-miR-277*    | √ | √ | — | — | — | insect_specific | specific     | √ | √ | — | — | — | √ |
| har-miR-2779    | √ | √ | — | — | — | insect_specific | specific     | √ | — | √ | — | √ | √ |
| har-miR-278*    | √ | √ | — | — | — | insect_specific | specific     | √ | √ | — | — | √ | √ |
| har-miR-282*    | √ | √ | — | — | — | insect_specific | specific     | √ | √ | — | — | √ | — |
| har-miR-305*    | √ | √ | — | — | — | insect_specific | specific     | √ | √ | √ | — | √ | √ |

|              |   |   |   |   |   |                 |          |   |   |   |   |   |   |
|--------------|---|---|---|---|---|-----------------|----------|---|---|---|---|---|---|
| har-miR-306a | √ | √ | — | — | — | insect_specific | specific | √ | √ | √ | √ | √ | √ |
| har-miR-308  | √ | √ | — | — | — | insect_specific | specific | √ | √ | √ | √ | √ | √ |
| har-miR-31   | √ | √ | — | — | — | insect_specific | specific | √ | √ | √ | — | √ | √ |
| har-miR-317* | √ | √ | — | — | — | insect_specific | specific | √ | — | — | — | — | — |
| har-miR-3338 | √ | √ | — | — | — | insect_specific | specific | √ | √ | √ | √ | — | — |
| har-miR-34*  | √ | √ | — | — | — | insect_specific | specific | √ | — | — | — | — | — |
| har-miR-375* | √ | √ | — | — | — | insect_specific | specific | √ | — | — | √ | — | — |
| har-miR-745  | √ | √ | — | — | — | insect_specific | specific | √ | √ | √ | √ | √ | √ |
| har-miR-750  | √ | √ | — | — | — | insect_specific | specific | √ | √ | √ | √ | — | — |
| har-miR-750* | √ | √ | — | — | — | insect_specific | specific | √ | √ | √ | — | √ | — |
| har-miR-87   | √ | √ | — | — | — | insect_specific | specific | √ | √ | √ | √ | √ | — |
| har-miR-92b  | √ | √ | — | — | — | insect_specific | specific | √ | √ | √ | √ | √ | √ |
| har-miR-9c   | √ | √ | — | — | — | insect_specific | specific | √ | √ | √ | √ | √ | √ |
| har-miR-9c*  | √ | √ | — | — | — | insect_specific | specific | √ | √ | — | √ | √ | √ |

**Table S5. Homology analysis of *S. litura* miRNA homologs.** Metazoan species were divided into four catalogs: insects, other arthropods (arthropods other than insects), other invertebrates (invertebrates other than arthropods), and vertebrates. According to the BLAST results, the miRNAs were classified into four kinds: highly conserved (with homologs in vertebrates), invertebrate-specific (with homologs only in invertebrates), arthropod-specific (with homologs only in arthropods), and insect-specific (with homologs only in insects). “√” indicates the existence of miRNA homologs in the corresponding category. The column “Note” lists our definition of the miRNA (highly conserved, invertebrate-specific, arthropod-specific, or insect-specific). The column "LepiSpecific" indicates whether the miRNA is only identified in lepidopteran species. The last 6 columns indicates whether the miRNA has homologs in the corresponding species. The abbreviations represent species as follows: bmo, *Bombyx mori*; har, *Helicoverpa armigera*; mse, *Manduca sexta*; dpl, *Danaus plexippus*; hmeM, *Heliconius melpomene melpomene*; hmeR, *Heliconius melpomene rosina*.

| sli-miR         | Lepidopteran | Insects | OtherArthropods | OtherInvertbrates | Vertebrates | Note                  | LepiSpecific | bmo | har | mse | dpl | hmeM | hmeR |
|-----------------|--------------|---------|-----------------|-------------------|-------------|-----------------------|--------------|-----|-----|-----|-----|------|------|
| sli-let-7       | √            | √       | √               | √                 | √           | highly_conserved      | non-specific | √   | √   | √   | √   | √    | √    |
| sli-miR-10      | √            | √       | √               | √                 | √           | highly_conserved      | non-specific | √   | √   | —   | √   | √    | √    |
| sli-miR-100     | √            | √       | √               | √                 | √           | highly_conserved      | non-specific | √   | √   | √   | —   | √    | √    |
| sli-miR-124     | √            | √       | √               | √                 | √           | highly_conserved      | non-specific | √   | √   | √   | √   | —    | —    |
| sli-miR-133     | √            | √       | √               | √                 | √           | highly_conserved      | non-specific | √   | √   | √   | √   | —    | —    |
| sli-miR-137     | √            | √       | √               | √                 | √           | highly_conserved      | non-specific | √   | √   | √   | √   | √    | —    |
| sli-miR-184     | √            | √       | √               | √                 | √           | highly_conserved      | non-specific | √   | √   | √   | √   | √    | √    |
| sli-miR-190     | √            | √       | —               | √                 | √           | highly_conserved      | non-specific | √   | √   | √   | √   | √    | —    |
| sli-miR-1a      | √            | √       | √               | √                 | √           | highly_conserved      | non-specific | √   | √   | √   | √   | √    | √    |
| sli-miR-210     | √            | √       | —               | √                 | √           | highly_conserved      | non-specific | √   | √   | √   | √   | √    | √    |
| sli-miR-281     | √            | √       | √               | √                 | √           | highly_conserved      | non-specific | √   | √   | √   | √   | —    | —    |
| sli-miR-33      | √            | √       | √               | √                 | √           | highly_conserved      | non-specific | √   | √   | √   | —   | —    | —    |
| sli-miR-7       | √            | √       | √               | √                 | √           | highly_conserved      | non-specific | √   | √   | √   | √   | √    | √    |
| sli-miR-993a*   | √            | √       | —               | √                 | √           | highly_conserved      | non-specific | √   | √   | √   | —   | √    | √    |
| sli-miR-993b*   | √            | √       | —               | √                 | √           | highly_conserved      | non-specific | √   | √   | √   | —   | √    | √    |
| sli-miR-9a      | √            | √       | √               | √                 | √           | highly_conserved      | non-specific | √   | √   | √   | √   | √    | √    |
| sli-bantam      | √            | √       | √               | √                 | —           | invertebrate_specific | non-specific | √   | √   | √   | √   | √    | √    |
| sli-miR-1175-3p | √            | √       | —               | √                 | —           | invertebrate_specific | non-specific | √   | √   | √   | √   | —    | —    |
| sli-miR-252     | √            | √       | √               | √                 | —           | invertebrate_specific | non-specific | √   | √   | √   | √   | —    | —    |
| sli-miR-263a    | √            | √       | √               | √                 | —           | invertebrate_specific | non-specific | √   | √   | √   | √   | √    | √    |

|                  |   |   |   |   |   |                       |              |   |   |   |   |   |   |
|------------------|---|---|---|---|---|-----------------------|--------------|---|---|---|---|---|---|
| sli-miR-263b     | √ | √ | √ | √ | — | invertebrate_specific | non-specific | √ | √ | √ | √ | √ | √ |
| sli-miR-279a     | √ | √ | √ | √ | — | invertebrate_specific | non-specific | √ | √ | √ | √ | √ | √ |
| sli-miR-279c     | √ | √ | — | √ | — | invertebrate_specific | non-specific | √ | √ | √ | √ | √ | √ |
| sli-miR-283      | √ | √ | — | √ | — | invertebrate_specific | non-specific | √ | √ | √ | √ | — | — |
| sli-miR-2a       | √ | √ | √ | √ | — | invertebrate_specific | non-specific | √ | √ | √ | √ | √ | √ |
| sli-miR-2b       | √ | √ | √ | √ | — | invertebrate_specific | non-specific | √ | √ | √ | √ | √ | √ |
| sli-miR-307      | √ | √ | √ | √ | — | invertebrate_specific | non-specific | √ | √ | √ | √ | √ | — |
| sli-miR-317      | √ | √ | √ | √ | — | invertebrate_specific | non-specific | √ | √ | √ | √ | √ | √ |
| sli-miR-34       | √ | √ | √ | √ | — | invertebrate_specific | non-specific | √ | √ | √ | √ | √ | √ |
| sli-miR-8        | √ | √ | √ | √ | — | invertebrate_specific | non-specific | √ | √ | √ | √ | √ | √ |
| sli-miR-87       | √ | √ | √ | √ | — | invertebrate_specific | non-specific | √ | √ | √ | √ | √ | — |
| sli-miR-993a     | √ | √ | √ | √ | — | invertebrate_specific | non-specific | √ | √ | — | — | — | — |
| sli-miR-9a*      | √ | √ | √ | √ | — | invertebrate_specific | non-specific | √ | √ | √ | √ | √ | √ |
| sli-miR-12       | √ | √ | √ | — | — | arthropod_specific    | non-specific | √ | √ | √ | — | √ | √ |
| sli-miR-275      | √ | √ | √ | — | — | arthropod_specific    | non-specific | √ | √ | √ | √ | √ | √ |
| sli-miR-276*     | √ | √ | √ | — | — | arthropod_specific    | non-specific | √ | √ | √ | √ | √ | √ |
| sli-miR-278      | √ | √ | √ | — | — | arthropod_specific    | non-specific | √ | √ | √ | √ | √ | — |
| sli-miR-305      | √ | √ | √ | — | — | arthropod_specific    | non-specific | √ | √ | √ | √ | √ | √ |
| sli-miR-31       | √ | √ | √ | — | — | arthropod_specific    | non-specific | √ | √ | √ | √ | √ | √ |
| sli-miR-965*     | √ | √ | √ | — | — | arthropod_specific    | non-specific | √ | √ | √ | √ | √ | — |
| sli-miR-iab-4-5p | √ | √ | √ | — | — | arthropod_specific    | non-specific | √ | √ | √ | — | — | — |
| sli-miR-10*      | √ | √ | — | — | — | insect_specific       | non-specific | √ | √ | √ | — | √ | √ |
| sli-miR-1000     | √ | √ | — | — | — | insect_specific       | non-specific | √ | √ | √ | √ | — | — |
| sli-miR-11       | √ | √ | — | — | — | insect_specific       | non-specific | √ | √ | √ | √ | √ | √ |
| sli-miR-13a      | √ | √ | — | — | — | insect_specific       | non-specific | √ | √ | √ | √ | √ | √ |
| sli-miR-13b      | √ | √ | — | — | — | insect_specific       | non-specific | √ | √ | √ | √ | √ | √ |
| sli-miR-14       | √ | √ | — | — | — | insect_specific       | non-specific | √ | √ | √ | √ | √ | √ |
| sli-miR-1a*      | √ | √ | — | — | — | insect_specific       | non-specific | √ | √ | — | — | — | — |
| sli-miR-276      | √ | √ | — | — | — | insect_specific       | non-specific | √ | √ | — | — | √ | √ |
| sli-miR-2765     | √ | √ | — | — | — | insect_specific       | non-specific | √ | √ | √ | √ | √ | √ |
| sli-miR-277      | √ | √ | — | — | — | insect_specific       | non-specific | √ | √ | √ | — | √ | √ |

|                 |   |   |   |   |   |                 |              |   |   |   |   |   |   |
|-----------------|---|---|---|---|---|-----------------|--------------|---|---|---|---|---|---|
| sli-miR-2796-3p | √ | √ | — | — | — | insect_specific | non-specific | √ | √ | √ | √ | — | — |
| sli-miR-279b    | √ | √ | — | — | — | insect_specific | non-specific | √ | √ | √ | √ | √ | √ |
| sli-miR-281*    | √ | √ | — | — | — | insect_specific | non-specific | √ | √ | — | — | √ | √ |
| sli-miR-282     | √ | √ | — | — | — | insect_specific | non-specific | √ | √ | √ | √ | — | — |
| sli-miR-282*    | √ | √ | — | — | — | insect_specific | non-specific | √ | √ | — | — | √ | — |
| sli-miR-285     | √ | √ | — | — | — | insect_specific | non-specific | √ | √ | √ | √ | — | — |
| sli-miR-305*    | √ | √ | — | — | — | insect_specific | non-specific | √ | √ | √ | — | √ | √ |
| sli-miR-307*    | √ | √ | — | — | — | insect_specific | non-specific | √ | √ | — | — | √ | — |
| sli-miR-71*     | √ | √ | — | — | — | insect_specific | non-specific | √ | √ | — | — | √ | √ |
| sli-miR-79      | √ | √ | — | — | — | insect_specific | non-specific | √ | √ | √ | √ | √ | √ |
| sli-miR-8*      | √ | √ | — | — | — | insect_specific | non-specific | √ | √ | — | — | √ | √ |
| sli-miR-927     | √ | √ | — | — | — | insect_specific | non-specific | √ | √ | √ | — | — | — |
| sli-miR-927*    | √ | √ | — | — | — | insect_specific | non-specific | √ | √ | — | — | — | √ |
| sli-miR-929     | √ | √ | — | — | — | insect_specific | non-specific | √ | — | — | √ | — | — |
| sli-miR-92a     | √ | √ | — | — | — | insect_specific | non-specific | √ | √ | √ | √ | √ | √ |
| sli-miR-932     | √ | √ | — | — | — | insect_specific | non-specific | √ | √ | √ | √ | — | — |
| sli-miR-970     | √ | √ | — | — | — | insect_specific | non-specific | √ | √ | √ | √ | √ | √ |
| sli-miR-989     | √ | √ | — | — | — | insect_specific | non-specific | √ | √ | √ | √ | √ | √ |
| sli-miR-998     | √ | √ | — | — | — | insect_specific | non-specific | √ | √ | √ | √ | √ | √ |
| sli-miR-iab-8   | √ | √ | — | — | — | insect_specific | non-specific | √ | √ | √ | — | — | — |
| sli-bantam*     | √ | √ | — | — | — | insect_specific | specific     | √ | — | — | — | √ | √ |
| sli-miR-1       | √ | √ | — | — | — | insect_specific | specific     | √ | √ | — | — | √ | √ |
| sli-miR-1175-5p | √ | √ | — | — | — | insect_specific | specific     | √ | √ | √ | — | — | — |
| sli-miR-274     | √ | √ | — | — | — | insect_specific | specific     | √ | √ | √ | √ | — | — |
| sli-miR-2755    | √ | √ | — | — | — | insect_specific | specific     | √ | √ | √ | √ | √ | √ |
| sli-miR-2766    | √ | √ | — | — | — | insect_specific | specific     | √ | √ | √ | √ | √ | √ |
| sli-miR-2767    | √ | √ | — | — | — | insect_specific | specific     | √ | √ | √ | √ | √ | √ |
| sli-miR-2768    | √ | √ | — | — | — | insect_specific | specific     | √ | √ | √ | √ | √ | √ |
| sli-miR-277*    | √ | √ | — | — | — | insect_specific | specific     | √ | √ | — | — | — | — |
| sli-miR-278*    | √ | √ | — | — | — | insect_specific | specific     | √ | √ | — | — | √ | √ |
| sli-miR-306a    | √ | √ | — | — | — | insect_specific | specific     | √ | √ | √ | √ | √ | √ |

|              |   |   |   |   |   |                 |          |   |   |   |   |   |   |
|--------------|---|---|---|---|---|-----------------|----------|---|---|---|---|---|---|
| sli-miR-308  | √ | √ | — | — | — | insect_specific | specific | √ | √ | √ | √ | √ | √ |
| sli-miR-3338 | √ | √ | — | — | — | insect_specific | specific | √ | √ | √ | √ | — | — |
| sli-miR-745  | √ | √ | — | — | — | insect_specific | specific | √ | √ | √ | √ | √ | √ |
| sli-miR-750  | √ | √ | — | — | — | insect_specific | specific | √ | √ | √ | √ | — | — |
| sli-miR-750* | √ | √ | — | — | — | insect_specific | specific | √ | √ | √ | — | √ | — |
| sli-miR-79*  | √ | √ | — | — | — | insect_specific | specific | √ | — | — | — | — | — |
| sli-miR-92b  | √ | √ | — | — | — | insect_specific | specific | √ | √ | √ | √ | √ | √ |
| sli-miR-9c   | √ | √ | — | — | — | insect_specific | specific | √ | √ | √ | √ | √ | √ |
| sli-miR-9c*  | √ | √ | — | — | — | insect_specific | specific | √ | √ | — | √ | √ | √ |





(B)

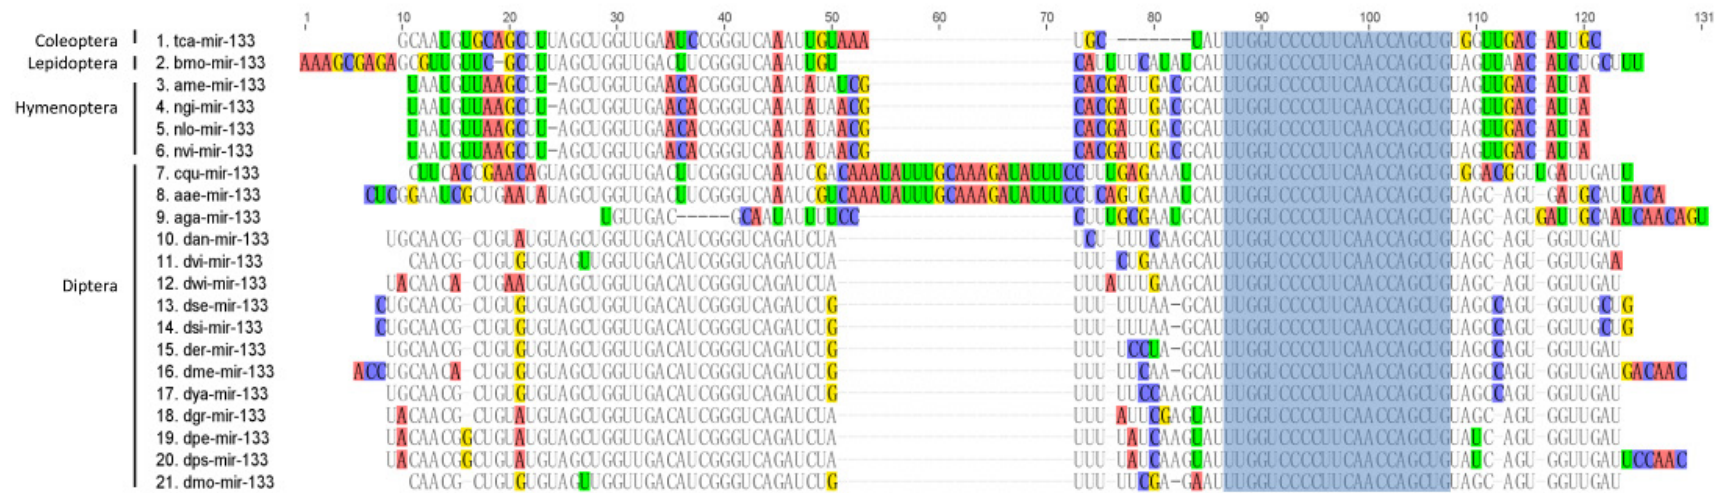

(C)

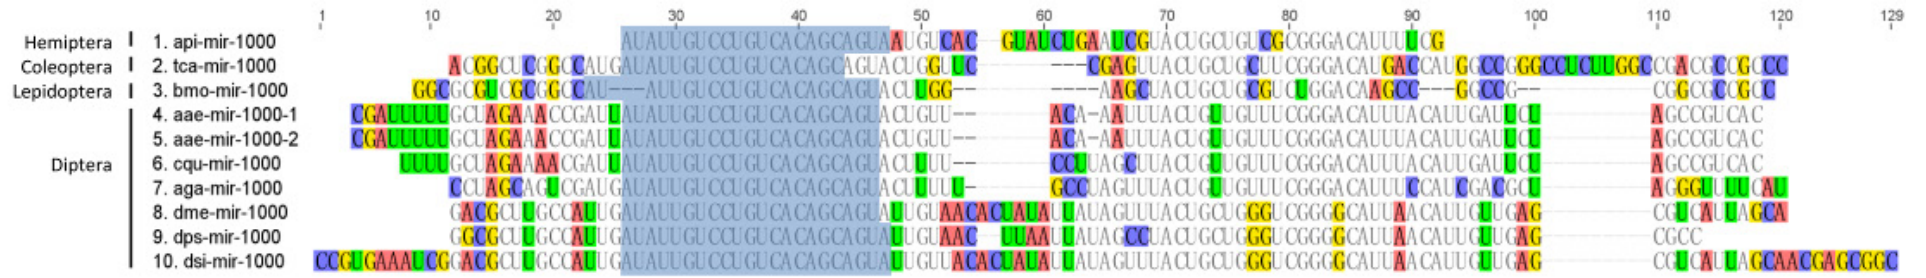

(D)

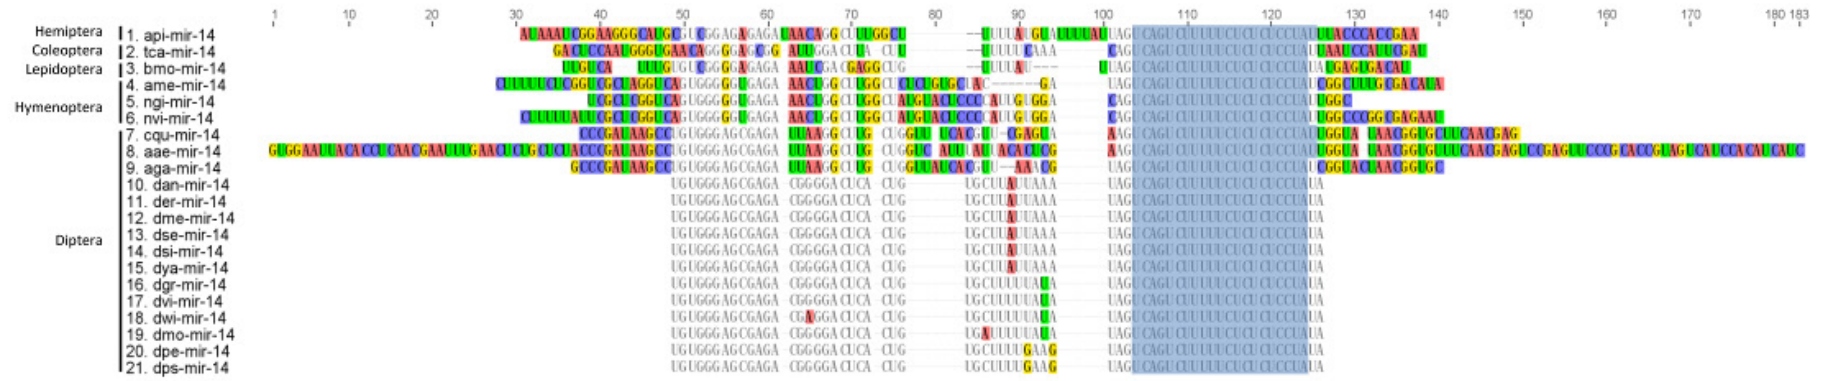

Supplement: ijbsv09p0001s1.pdf [file ijbsv09p0001s1.pdf]
